# Supplementary material for: Lung Inflammasome Activation in SARS-CoV-2 Post-Mortem Biopsies
Source: MDPI journal article supplement (doi:10.3390/ijms232113033), 2022-10-27
Supplement: s1 [file s1]

**Table S1.** List of antibodies used in immunohistochemical staining.

| Antibody            | Type              | Clone/Code | Dilution | Brand        |
|---------------------|-------------------|------------|----------|--------------|
| Anti-IL-18          | Polyclonal/Rabbit | EC9312     | 1:200    | Elabscience  |
| Anti-IL-1 $\beta$   | Polyclonal/Rabbit | A16288     | 1:50     | ABclonal     |
| Anti-TNF- $\alpha$  | Monoclonal/Rat    | TA20       | 01:50    | Santa Cruz   |
| Anti-CASP1          | Polyclonal/Rabbit | A0964      | 1:200    | ABclonal     |
| Anti-CASP9          | Polyclonal/Rabbit | PAA627Hu01 | 1:100    | Cloud-Clone  |
| Anti-GSDMD          | Polyclonal/Rabbit | A18281     | 1:100    | ABclonal     |
| Anti-ASC            | Polyclonal/Rabbit | sc-33796   | 1:200    | Santa Cruz   |
| Anti-NLRP-3/NALP    | Polyclonal/Goat   | ab4207     | 1:100    | Abcam        |
| Anti-NF- $\kappa$ B | Polyclonal/Rabbit | ab7971     | 1:200    | Abcam        |
| Anti-NOX4           | Polyclonal/Rabbit | Bs-6213R   | 1:100    | Bioss        |
| Anti-TLR4           | Polyclonal/Rabbit | PA-23125   | 1:100    | ThermoFisher |
